# Supplementary material for: Corticosterone activity during early weaning reprograms molecular markers in rat gastric secretory cells
Source: PubMed Central journal article supplement (PMC5374460; doi:10.1038/srep45867), 2017-03-31
Supplement: srep45867-s1.pdf [file srep45867-s1.pdf]

Corticosterone activity during early weaning reprograms molecular markers in rat gastric secretory cells

Juliana Guimarães Zulian, Larissa Yukari Massarenti Hosoya, Priscila Moreira

Figueiredo, Daniela Ogias, Luciana Harumi Osaki, Patricia Gama\*

Department of Cell and Developmental Biology, Institute of Biomedical Sciences,  
University of Sao Paulo, Sao Paulo, SP, Brazil.

**Supplementary Table S1** Primers used for RT-qPCR with Power SYBR® Green PCR

Master Mix

| <b>Gene/protein</b>  | <b>Foward</b>              | <b>Reverse</b>             | <b>Primer concentration</b> |
|----------------------|----------------------------|----------------------------|-----------------------------|
| <i>Gapdh/GAPDH</i>   | AGTGCCAGCCTC<br>GTCTCATAG  | TAACCAGGCGT<br>CCGATACG    | 100nM                       |
| <i>Sgk1/SGK1</i>     | TATGGCCTGCCT<br>CCGTTCT    | GTGCCTTGCTGA<br>GTTGGTGAT  | 150nM                       |
| <i>Bhlha15/Mist1</i> | GAACTTGTGCTT<br>GGTCCATCCT | TCCCTATCCTGC<br>GTTCAACAAC | 150nM                       |

**Supplementary Table S2** TaqMan® probe assays used for RT-qPCR

| <b>Gene</b>   | <b>Assay ID</b> | <b>Codified protein</b>  |
|---------------|-----------------|--------------------------|
| <i>Actb</i>   | Rn00667869_m1   | $\beta$ -actin           |
| <i>Nr3c1</i>  | Rn00561369_m1   | Glucocorticoids receptor |
| <i>Muc6</i>   | Rn1759814_m1    | Mucin 6                  |
| <i>Muc5ac</i> | Rn01451270_g1   | Mucin 5AC                |
| <i>Pga5</i>   | Rn00572739_m1   | Pepsinogen 5, group 1    |
| <i>Pgc</i>    | Rn00590984_m1   | Pepsinogen C             |

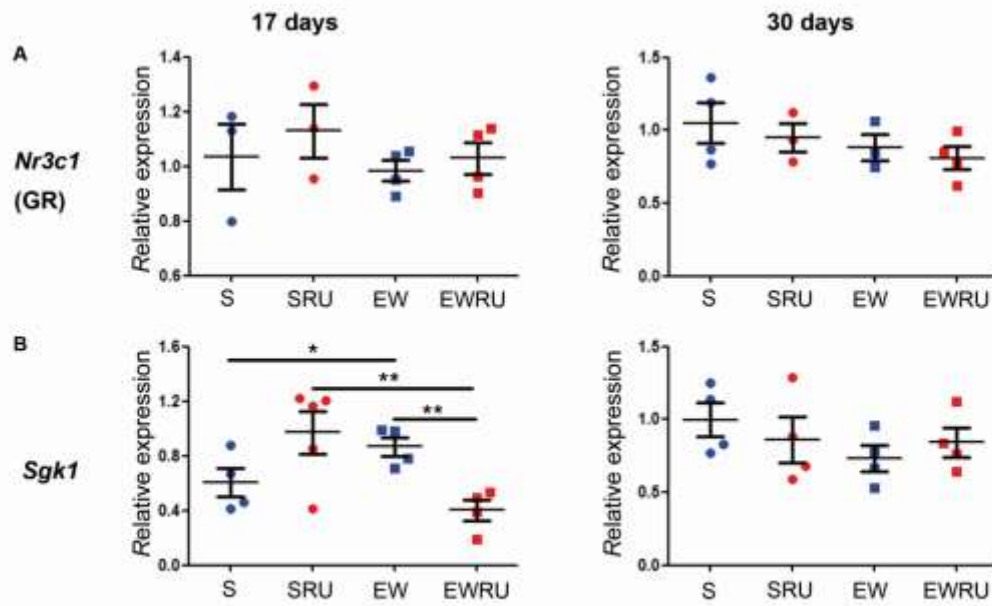

**Supplementary Figure 1.** *Nr3c1* (GR) and *Sgk1* (SGK1) expression in suckling (S) and early-weaned rats (EW) treated with vehicle (corn oil) or RU486. Values shown as means  $\pm$  S.E.M. (n) = 3- 5 animals/ group/ age. \* $P$ <0.05 and \*\* $P$ <0.01 after one-tailed Student *t* test to compare dietary condition or RU486 effect.
